# Supplementary material for: Light-swing CO2 capture: photoirradiation-based chemical CO2 release based on photoisomerization of azobenzene-amine/guanidine derivatives
Source: Royal Society of Chemistry journal article supplement (doi:10.1039/d4gc00736k), 2024-01-01

## Electronic Supplementary Information

### Light Swing CO<sub>2</sub> Capture: Photoirradiation-Type Chemical CO<sub>2</sub> Release Based on Photoisomerization of Azobenzene-Amine/Guanidine Derivatives

Ryo Murakami\*, Keitaro Shiota‡, Ayaka Uchida‡ and Fuyuhiko Inagaki\*

*Faculty of Pharmaceutical Sciences, Kobe Gakuin University, 1-1-3 Minatojima, Chuo-ku,  
Kobe 650-8586, Japan.*

Email: [rmurakami@pharm.kobegakuin.ac.jp](mailto:rmurakami@pharm.kobegakuin.ac.jp); [finagaki@pharm.kobegakuin.ac.jp](mailto:finagaki@pharm.kobegakuin.ac.jp)

‡These authors contributed equally

#### Table of Contents

|                                          |         |
|------------------------------------------|---------|
| 1. Instrumentation and Chemicals         | S2      |
| 2. Preparation of Azobenzene derivatives | S3–S6   |
| 3. Experimental Procedure                | S7–S17  |
| 4. X-ray Crystallographic Analysis       | S18–S20 |
| 5. References                            | S21     |
| 6. NMR Spectra                           | S22–S28 |

## 1. Instrumentation and Chemicals

$^1\text{H}$ (400 MHz),  $^{13}\text{C}$ (100 MHz) NMR spectra were recorded on a Bruker Bio Spin Inc., Ascend 400 spectrometer. Chemical shifts values for  $^1\text{H}$ ,  $^{13}\text{C}$  NMR spectra are referenced to  $\text{Me}_4\text{Si}$ . Chemical shifts are reported in  $\delta$  ppm. High-resolution mass spectra were recorded on a Bruker micrOTOF-Q mass spectrometer. IR spectra were measured with a Thermo Scientific<sup>TM</sup> Nicolet<sup>TM</sup> iST<sup>TM</sup> 5 FT-IR. UV spectra were measured with a JASCO V-750 spectrophotometer. Elemental analysis was measured J-Science Lab Micro Corder JM-10 at the Research Institute for Instrumental Analysis, Advanced Science Research Center, Kanazawa University. Single-crystal X-ray data were collected on a Dual Thickness MicroLoops (MiTeGen, 50 mm in diameter) with a XtaLAB mini II (Rigaku), Dualflex, HyPix diffractometer. □ Concentration of  $\text{CO}_2$  was measured with Good ability GC-02 (sealed space). Oil-free air compressor (SILENTAIR, SA2000S) and mass flow controller (Fujikin, FCS-T1000L) were used.  $\text{CO}_2$  concentration was monitored by using nondispersive infrared  $\text{CO}_2$  meters (VAISALA, GMP252). 3 UV Multi-Wavelength Lamp (analytik Jena) was used as the light source. Biotage Selekt was used for Silica-gel column chromatography. Flash cartridge (Sfär Silica HC D High Capacity Duo 20  $\mu\text{m}$ ) was used for column chromatography. TLC analysis were performed on commercial glass plates bearing 0.25-mm layer of Merck Silica gel 60F<sub>254</sub>. Commercially available 2-Aminobenzylamine (Tokyo Chemical Industry), 3-Aminobenzylamine (FUJIFILM Wako Pure Chemical Industry), Di-*t*-butyl Dicarboxylate ( $\text{Boc}_2\text{O}$ , WATANABE Chemical Industry), Nitrosobenzene (Aldrich), Acetic Acid (Tokyo Chemical Industry), Trifluoroacetic Acid (Tokyo Chemical Industry), 4-Nitroaniline (Aldrich), Hydrochloric Acid (FUJIFILM Wako Pure Chemical Industry), Sodium Nitrite (Tokyo Chemical Industry), N,N-Dimethylaniline (Tokyo Chemical Industry), Sodium hydroxide (Kishida Chemical), Sodium Sulfide ( $\text{Na}_2\text{S}$ , FUJIFILM Wako Pure Chemical Industry), Hydrogen Chloride in 1,4-Dioxane Solution (FUJIFILM Wako Pure Chemical Industry), Cyanamide (FUJIFILM Wako Pure Chemical Industry) were employed for reactions. All other chemicals and solvents were purchased from commercial sources and used without further purification.

## 2. Preparation of Azobenzene Derivatives

### 2.1. General Procedure for Azobenzene-Amines (o-3a and m-3b)<sup>1</sup>

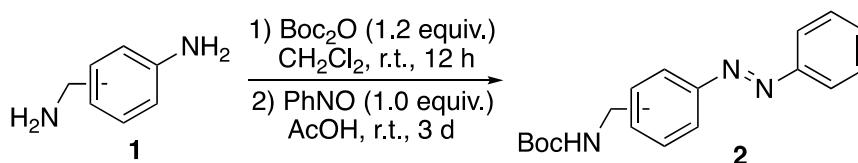

In a nitrogen gas atmosphere, Aminobenzylamine **1** (7.32 g, 60 mmol),  $\text{CH}_2\text{Cl}_2$  (70 mL) were placed in 200 mL flask containing a magnetic stirring bar. The flask was sealed with a Precision Seal Septa.  $\text{Boc}_2\text{O}$  (15.7 g, 72 mmol) in  $\text{CH}_2\text{Cl}_2$  (72 mL) solution was slowly added to the mixture using a syringe at 0 °C. The mixture was stirred at room temperature until the starting material had been consumed (TLC monitoring). The solvent was concentrated to dryness under reduced pressure. The resulting product was used to the next reaction without further purification. Then, in a nitrogen gas atmosphere, Boc-protected product (2.23 g, 10 mmol), nitroso benzene (1.07 g, 10 mmol) and acetic acid (5 mL) were placed in 100 mL flask containing a magnetic stirring bar. The flask was sealed with a Precision Seal Septa. After stirring for 3 days at room temperature, the reaction mixture was neutralized with 1M NaOH aq and the mixture was extracted with AcOEt. The combined organic layers were washed twice with 1M NaOH aq, water, brine, and concentrated to dryness. The residue was purified by Silica-gel column chromatography to afford **2**.

#### *Tert*-butyl (*E*)-[2-(phenyldiazenyl)benzyl]carbamate (**2a**)

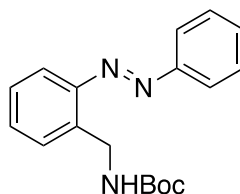

Compound **2a** was an orange solid (60% yield). <sup>1</sup>H NMR ( $\text{CDCl}_3$ )  $\delta$  1.36 (s, 9H), 4.74 (s, 2H), 5.00 (br, 1H), 7.29 (td,  $J$  = 7.8, 1.2 Hz, 1H), 7.34 (td,  $J$  = 7.8, 1.2 Hz, 1H), 7.41-7.47 (m, 4H), 7.63 (dd,  $J$  = 7.8, 1.2 Hz, 1H), 7.83 (dd,  $J$  = 8.4, 1.6 Hz, 2H). <sup>13</sup>C NMR ( $\text{CDCl}_3$ )  $\delta$  28.4, 41.0, 79.4, 115.8, 123.0, 128.2, 129.1, 129.6, 131.2, 131.4, 137.9, 149.9, 152.7, 155.8. IR (ATR): 2359, 2341, 1686, 1653, 1526, 1506, 1388, 1363, 1166, 776  $\text{cm}^{-1}$ .

#### *Tert*-butyl (*E*)-[3-(phenyldiazenyl)benzyl]carbamate (**2b**)

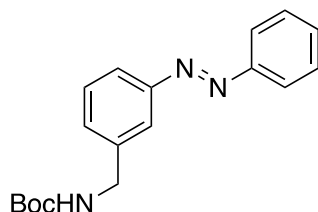

Compound **2b** was an orange solid (60% yield).  $^1\text{H}$  NMR ( $\text{CDCl}_3$ ):  $\delta$  1.49 (s, 9H), 4.43 (s, 2H), 5.02 (br, 1H), 7.41–7.42 (m, 1H), 7.47–7.56 (m, 4H), 7.83–7.85 (m, 2H), 7.92–7.94 (m, 2H).  $^{13}\text{C}$  NMR ( $\text{CDCl}_3$ ):  $\delta$  28.4, 44.4, 79.6, 121.2, 122.2, 122.8, 129.1, 129.3, 129.9, 131.1, 140.1, 152.5, 152.8, 155.9. IR (ATR): 2360, 2341, 1700, 1675, 1558, 1540, 1533, 1456, 1168, 766  $\text{cm}^{-1}$ .

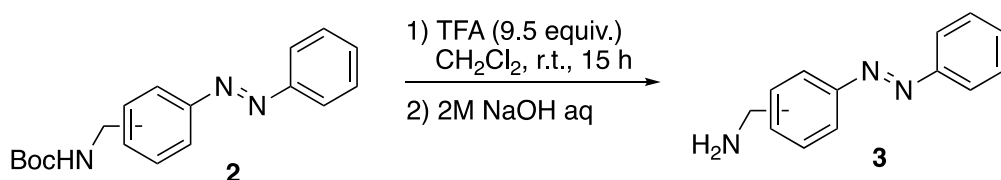

In a nitrogen gas atmosphere, **2** (1.8 g, 5.8 mmol),  $\text{CH}_2\text{Cl}_2$  (15 mL) were placed in 100 mL flask containing a magnetic stirring bar. TFA (4.2 mL, 9.5 equiv.) was added to the flask was sealed with a Precision Seal Septa using a syringe. After stirring at room temperature for 1 day, solvent was concentrated to dryness under reduced pressure. The residue was dissolved in AcOEt and the solution was neutralized with 2M NaOH aq. The mixture was extracted with AcOEt and the combined organic layers were washed with 1M NaOH and brine. The organic phase was dried by  $\text{Na}_2\text{SO}_4$  and concentrated to dryness under reduced pressure to afford **3**.

**(E)-[2-(phenyldiazenyl)phenyl]methanamine (o-3a).**

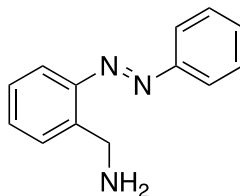

Compound **o-3a** was an orange liquid (97% yield). UV-vis ( $\text{CH}_2\text{Cl}_2$ ):  $\lambda_{\text{max}}$  = 326 nm.  $^1\text{H}$  NMR ( $\text{CDCl}_3$ ):  $\delta$  1.66 (br, 2H), 4.31 (s, 2H), 7.34–7.38 (m, 1H), 7.43–7.55 (m, 5H), 7.72 (d,  $J$  = 8.4 Hz, 1H), 7.92 (d,  $J$  = 8.4 Hz, 2H).  $^{13}\text{C}$  NMR ( $\text{CDCl}_3$ ):  $\delta$  43.7, 115.9, 123.2, 127.9, 129.26, 129.30, 131.3, 131.6, 142.8, 150.1, 152.9. IR (ATR): 3365, 2933, 1960, 1597, 1451, 1297, 1150, 1070  $\text{cm}^{-1}$ .

**(E)-[3-(phenyldiazenyl)phenyl]methanamine (m-3b).**

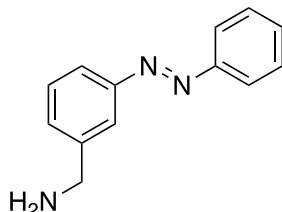

Compound **m-3b** was an orange liquid (94% yield). **UV-vis** ( $\text{CH}_2\text{Cl}_2$ ):  $\lambda_{\text{max}} = 321 \text{ nm}$ .  **$^1\text{H}$  NMR** ( $\text{CDCl}_3$ ):  $\delta$  1.52 (br, 2H), 3.99 (s, 2H), 7.44 (d,  $J = 7.2 \text{ Hz}$ , 1H), 7.49 (t,  $J = 7.2 \text{ Hz}$ , 2H), 7.48–7.54 (m, 2H), 7.81 (d,  $J = 7.6 \text{ Hz}$ , 1H), 7.87 (s, 1H), 7.92 (d,  $J = 7.6 \text{ Hz}$ , 2H).  **$^{13}\text{C}$  NMR** ( $\text{CDCl}_3$ ):  $\delta$  46.4, 120.9, 122.1, 123.0, 129.2, 129.4, 129.9, 131.2, 144.7, 152.8, 153.1. **IR** (ATR): 3365, 2856, 1585, 1446, 1304, 1150, 1070, 1019  $\text{cm}^{-1}$ .

**2.2 General Procedure for Azobenzene-Guanidine 7**

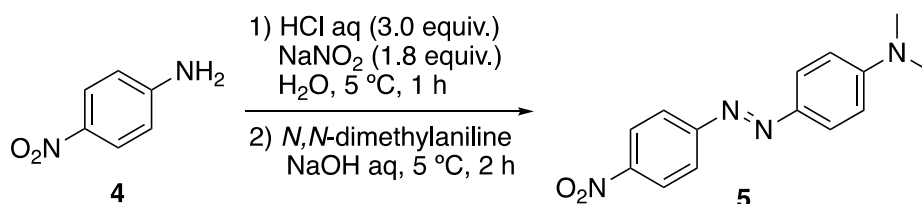

4-nitroaniline **4** (6.9 g, 50 mmol), water (90 mL) and 36 wt% HCl aq (13 mL, 150 mmol) were placed in 500 mL flask containing a magnetic stirring bar. The mixture was stirred at room temperature for 30 minutes. After stirred mixture cooled at 5 °C and was dropwise added Sodium Nitrite (6.2 g, 90 mmol) as an aqueous solution. The mixture was further stirred at 5 °C for 1 hour. Then, *N,N*-dimethylaniline (6.4 mL, 50.5 mmol) and 10 wt% NaOH aq (36 mL, 90 mmol) slow added to the mixture. After stirring at 5 °C for 1.5 hours, allowed to stand for 2 hours at 5 °C. The residue was filtered on a Büchner funnel and sucked as dry as possible. Dried reddish brown solid washed with AcOH (100mL) on a Büchner funnel and dried under reduced pressure to afford **5** as a reddish brown solid in 78% yield<sup>2</sup>.  **$^1\text{H}$  NMR** (400 MHz, d-DMSO):  $\delta$  3.11 (s, 6H), 6.88 (d,  $J = 9.2 \text{ Hz}$ , 2H), 7.86 (d,  $J = 9.2 \text{ Hz}$ , 2H), 7.93 (d,  $J = 9.2 \text{ Hz}$ , 2H), 8.35 (d,  $J = 9.2 \text{ Hz}$ , 2H).  **$^{13}\text{C}$  NMR** (100 MHz, d-DMSO):  $\delta$  39.5, 111.5, 122.2, 124.6, 125.5, 142.8, 146.8, 153.4, 156.1.

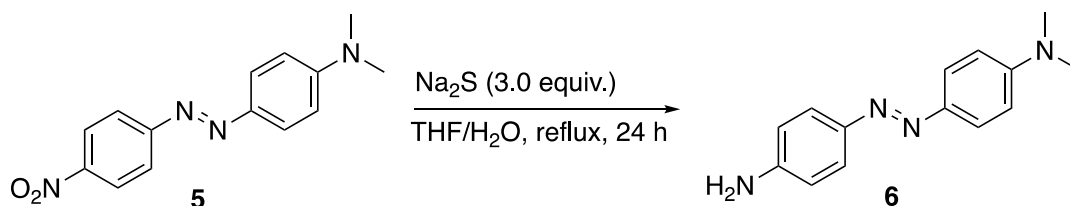

**5** (5.4 g, 20 mmol), solvent (160 mL, THF 75%, H<sub>2</sub>O 25%) and Na<sub>2</sub>S (4.7 g, 60 mmol) were placed in 300 mL flask containing a magnetic stirring bar. The mixture was refluxed at 95 °C for 24 hours. The residue was concentrated to dryness under reduced pressure, filtered on a Büchner funnel. The product was dried in vacuo to afford **6** as a reddish brown solid in 78% yield<sup>2</sup>. **<sup>1</sup>H NMR** (400 MHz, DMSO-d<sub>6</sub>): δ 3.00 (s, 6H), 5.70 (s, 2H), 6.64 (d, *J* = 8.8 Hz, 2H), 6.79 (d, *J* = 9.2 Hz, 2H), 7.55 (d, *J* = 8.8 Hz, 2H), 7.65 (d, *J* = 8.8 Hz, 2H). **<sup>13</sup>C NMR** (100 MHz, d-DMSO): δ 39.5, 111.5, 122.2, 124.6, 125.5, 142.8, 146.8, 153.4, 156.1.

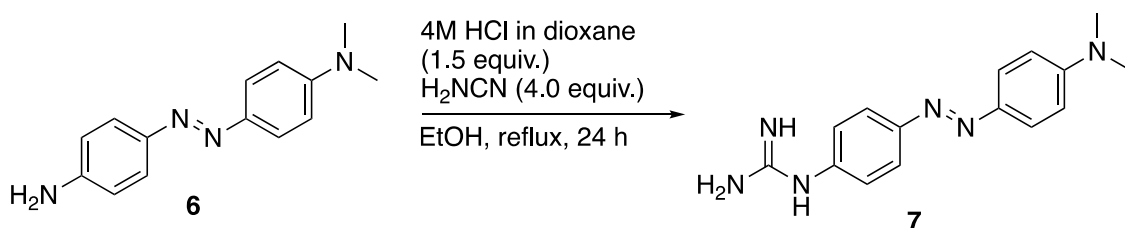

**6** (4.7 g, 19.6 mmol), ethanol (20 mL), Cyanamide (1.65 g, 39.2 mmol) and 4 M HCl in dioxane (4.9 mL 19.6 mmol) were placed in 100 mL flask containing a magnetic stirring bar. The mixture was refluxed at 95 °C for 24 hours. Then Cyanamide (1.65 g, 39.2 mmol) and 4 M HCl in dioxane (4.9 mL 19.6 mmol) added to the mixture. After refluxing for 3 hours, the mixture was added CH<sub>2</sub>Cl<sub>2</sub> (100 mL) and 1M NaOH aq (250 mL) just then precipitate solid. The solid was collected to afford 4-Guanidino-4'-dimethylaminoazobenzene **7** as an orange solid in 53% yield. **UV-vis** (DMSO): λ<sub>max</sub> = 457 nm. **<sup>1</sup>H NMR** (400 MHz, DMSO-d<sub>6</sub>): δ 3.02 (s, 6H), 5.38 (br, 4H), 6.81 (dd, *J* = 2.0, 9.2 Hz, 2H), 6.90 (dd, *J* = 2.0, 8.8 Hz, 2H), 7.65 (dd, *J* = 2.0, 8.8 Hz, 2H), 7.71 (dd, *J* = 2.0, 9.2 Hz, 2H). **<sup>13</sup>C NMR** (125 MHz, d-DMSO): δ 39.8, 111.6, 122.9, 123.0, 123.7, 142.9, 146.0, 151.6, 152.8, 153.4. **IR** (ATR): 1661, 1600, 1549, 1362, 1303, 1152, 865, 826. **HRMS-ESI** (*m/z*): [M+H]<sup>+</sup> Calcd for C<sub>15</sub>H<sub>18</sub>N<sub>6</sub>, 283.1665; found 283.1668.

### 3. Experimental Procedures

#### 3.1. General Procedure for CO<sub>2</sub> Absorption Experiment on Scale

Aminomethylated azobenzene derivatives **3** (2.11 g, 10 mmol) was set on the petri dish. The increment was measured with scale. The results are summarized in Figure 2b, Table S1.

**Table S1.** Increment of *o*-**3a** and *m*-**3b** in air.

| time<br>(h) | increment (g)        |                      |
|-------------|----------------------|----------------------|
|             | <i>o</i> - <b>3a</b> | <i>m</i> - <b>3b</b> |
| 0           | 0                    | 0                    |
| 2           | 0.08                 | 0.07                 |
| 4           | 0.14                 | 0.12                 |
| 6           | 0.14                 | 0.16                 |
| 8           | 0.15                 | 0.17                 |
| 10          | 0.15                 | 0.17                 |
| 12          | 0.16                 | 0.18                 |
| 14          | 0.16                 | 0.18                 |
| 16          | 0.16                 | 0.17                 |
| 18          | 0.16                 | 0.18                 |

#### 3.2. General Procedure for CO<sub>2</sub> Absorption Experiment in Elemental Analysis

Amine **3** (2.11 g, 10 mmol) was set on the petri dish. The sample was allowed to set overnight in a desiccator (35.7 L) under 1 vol% CO<sub>2</sub> and 99 vol% N<sub>2</sub> gas atmospheres. CO<sub>2</sub>-absorbed amino methyl azobenzene **3** was measured for elemental analysis. The results are summarized in Figure 2c and Table S2.

**Table S2.** CO<sub>2</sub> absorption under 1 vol% CO<sub>2</sub> and 99 vol% N<sub>2</sub> gas atmospheres

| Amine               |        | Elemental analysis (%) |      |       |
|---------------------|--------|------------------------|------|-------|
|                     |        | C                      | H    | N     |
| <i>o</i> - <b>3</b> | calcd. | 69.51                  | 5.62 | 18.01 |
|                     | found  | 69.51                  | 5.55 | 18.05 |
| <i>m</i> - <b>3</b> | calcd. | 69.51                  | 5.62 | 18.01 |
|                     | found  | 69.66                  | 5.57 | 18.02 |

Amine **3** (2.11 g, 10 mmol) was set on the petri dish. The sample was allowed to set overnight in air. CO<sub>2</sub>-absorbed amino methyl azobenzene **3** was measured for elemental analysis three times. The results are summarized in Figure 2d and Table S3.

**Table S3.** CO<sub>2</sub> absorption in air

| Amine               |        | Elemental analysis (%) |      |       |
|---------------------|--------|------------------------|------|-------|
|                     |        | C                      | H    | N     |
| <i>o</i> - <b>3</b> | calcd. | 70.32                  | 5.73 | 18.36 |
|                     | found  | 70.72                  | 5.73 | 18.32 |
| <i>m</i> - <b>3</b> | calcd. | 70.32                  | 5.73 | 18.36 |
|                     | found  | 70.35                  | 5.77 | 18.2  |

**3.3. General Procedure for Measurement of UV-vis Absorption Spectra**

UV-vis spectra of CO<sub>2</sub>-absorbed aminomethylazobenzene **3** ( $1.0 \times 10^{-5}$  M) were recorded using CH<sub>2</sub>Cl<sub>2</sub> as a solvent (Figure 3a). UV-vis spectra of CO<sub>2</sub>-absorbed azobenzene-guanidine **7** ( $1.0 \times 10^{-5}$  M) were recorded using DMSO as a solvent (Figure 5a). The corresponding absorption spectra were measured on a JASCO V-750 spectrophotometer using a screw-top quartz cuvette (10 × 10 mm, 3.5 mL).

**3.4. General Procedure for CO<sub>2</sub> Desorption of CO<sub>2</sub>-Absorbed Azobenzene-Amines under UV Irradiation**

Test tube in CO<sub>2</sub>-absorbed aminomethylazobenzene (*o*-**3a** and *m*-**3b**; amine : CO<sub>2</sub> = 5 : 2; derived from **3** in 10 mmol) put on the UV lamp ( $\lambda = 302$  nm). The flow rate of nitrogen gas was set to 200 ml/min using a mass flow controller (MFC), and the CO<sub>2</sub> concentration at the outlet side was measured over time for 12 h while nitrogen gas flowed through the test tube. The CO<sub>2</sub> concentration was measured by CO<sub>2</sub> monitor for 15 h. The results are summarized in Figure 3c and Table S4.

**Table S4.** CO<sub>2</sub> concentration using CO<sub>2</sub> releasing measurement device.

| time (h) | CO <sub>2</sub> conc. (ppm) |                      |
|----------|-----------------------------|----------------------|
|          | <i>o</i> - <b>3a</b>        | <i>m</i> - <b>3b</b> |
| 0        | 2                           | 2                    |
| 1        | 58                          | 52                   |
| 2        | 72                          | 82                   |
| 3        | 62                          | 76                   |
| 4        | 52                          | 82                   |
| 5        | 48                          | 68                   |
| 6        | 46                          | 52                   |
| 7        | 36                          | 48                   |
| 8        | 32                          | 32                   |
| 9        | 28                          | 12                   |
| 10       | 12                          | 6                    |
| 11       | 4                           | 8                    |
| 12       | 2                           | 8                    |

### 3.5. General Procedure for 1 vol% CO<sub>2</sub> Absorption of Azobenzene-Guanidine **7**

A mixed gas containing 1 vol% CO<sub>2</sub> and 99 vol% N<sub>2</sub> was flowed into azobenzene-guanidine **7** (7.6 mmol) in MeOH at a speed of 20 mL per minute by mass flow controller (MFC), and the resulting CO<sub>2</sub> concentration on the outlet side was measured over time. The results are summarized in Figure 4c and Table S5.

**Table S5.** CO<sub>2</sub> concentration on the outlet side.

| time (min) | CO <sub>2</sub> conc. (ppm) |
|------------|-----------------------------|
| 0          | 10000                       |
| 0.5        | 2342                        |
| 0.75       | 1756                        |
| 1          | 2352                        |
| 1.5        | 3070                        |
| 2          | 3280                        |
| 2.5        | 3386                        |
| 3          | 3480                        |
| 3.5        | 3598                        |
| 4          | 3726                        |
| 4.5        | 3884                        |
| 5          | 4098                        |
| 5.5        | 4418                        |
| 6          | 4798                        |
| 6.5        | 5252                        |
| 7          | 5752                        |
| 7.5        | 6294                        |
| 8          | 6896                        |
| 8.5        | 7448                        |
| 9          | 7928                        |
| 9.5        | 8350                        |
| 10         | 8712                        |
| 10.5       | 8972                        |
| 11         | 9188                        |
| 11.5       | 9364                        |
| 12         | 9444                        |
| 12.5       | 9534                        |
| 13         | 9610                        |
| 13.5       | 9640                        |
| 14         | 9684                        |
| 14.5       | 9690                        |
| 15         | 9690                        |
| 15.5       | 9714                        |
| 16         | 9700                        |
| 16.5       | 9620                        |
| 17         | 9560                        |

### 3.6. General procedure for CO<sub>2</sub> desorption of CO<sub>2</sub>-absorbed azobenzene-guanidine **7** under blue light irradiation

Separable flask in CO<sub>2</sub>-absorbed azobenzene-guanidine **7** (amine : CO<sub>2</sub> : MeOH = 1 : 1 : 1; derived from **7** (7.6 mmol)) put on the Blue LED (440 nm). The flow rate of nitrogen gas was set to 50 ml/min using a mass flow controller (MFC), and the CO<sub>2</sub> concentration at the outlet side was measured over time for 6 h while nitrogen gas flowed through the separable flask. The results are summarized in Figure 5c and Table S6.

**Table S6.** CO<sub>2</sub> concentration on the outlet side.

| time (min) | CO <sub>2</sub> conc. (ppm) |
|------------|-----------------------------|
| 10         | 2568                        |
| 20         | 3346                        |
| 30         | 3644                        |
| 40         | 3608                        |
| 50         | 3482                        |
| 60         | 3326                        |
| 70         | 3124                        |
| 80         | 2888                        |
| 90         | 2640                        |
| 100        | 2388                        |
| 110        | 2156                        |
| 120        | 1932                        |
| 130        | 1726                        |
| 140        | 1540                        |
| 150        | 1384                        |
| 160        | 2568                        |
| 170        | 3346                        |
| 180        | 3644                        |
| 190        | 3608                        |
| 200        | 3482                        |
| 210        | 3326                        |
| 220        | 3124                        |
| 230        | 2888                        |
| 240        | 2640                        |
| 250        | 2388                        |
| 260        | 2156                        |
| 270        | 1932                        |
| 280        | 1726                        |
| 290        | 1540                        |
| 300        | 1384                        |

### **3.7. General Procedure for CO<sub>2</sub> Desorption of CO<sub>2</sub>-Absorbed Azobenzene-Guanidine **7** under Thermal Condition without Photoirradiation**

Separable flask in CO<sub>2</sub>-absorbed azobenzene-guanidine **7** (amine : CO<sub>2</sub> : MeOH = 1 : 1 : 1; derived from **7** (7.6 mmol)) put on oil bath. Nitrogen gas was flowed into the separable flask at a rate of 50 mL/min using a mass flow controller (MFC), gradually heated (10 °C/30 min), and the CO<sub>2</sub> concentration at the outlet side was measured over time. The results are summarized in Figure 5d and Table S7.

**Table S7.** CO<sub>2</sub> concentration on the outlet side.

| time (min) | CO <sub>2</sub> conc. (ppm) | temp (°C) |
|------------|-----------------------------|-----------|
| 10         | 16                          | 30        |
| 20         | 18                          | 30        |
| 30         | 16                          | 30        |
| 40         | 20                          | 40        |
| 50         | 20                          | 40        |
| 60         | 24                          | 40        |
| 70         | 30                          | 50        |
| 80         | 30                          | 50        |
| 90         | 30                          | 50        |
| 100        | 40                          | 60        |
| 110        | 46                          | 60        |
| 120        | 50                          | 60        |
| 130        | 90                          | 70        |
| 140        | 106                         | 70        |
| 150        | 130                         | 70        |
| 160        | 190                         | 80        |
| 170        | 240                         | 80        |
| 180        | 490                         | 80        |
| 190        | 872                         | 90        |
| 200        | 1234                        | 90        |
| 210        | 2346                        | 90        |
| 220        | 3240                        | 100       |
| 230        | 3832                        | 100       |
| 240        | 4092                        | 100       |
| 250        | 4058                        | 100       |
| 260        | 3842                        | 100       |
| 270        | 3520                        | 100       |
| 280        | 3114                        | 100       |
| 290        | 2708                        | 100       |
| 300        | 2332                        | 100       |
| 310        | 1972                        | 100       |
| 320        | 1644                        | 100       |
| 330        | 1364                        | 100       |
| 340        | 1124                        | 100       |
| 350        | 912                         | 100       |
| 360        | 732                         | 100       |
| 370        | 586                         | 100       |
| 380        | 476                         | 100       |
| 390        | 380                         | 100       |
| 400        | 306                         | 100       |

| time (min) | CO <sub>2</sub> conc. (ppm) | temp (°C) |
|------------|-----------------------------|-----------|
| 410        | 244                         | 100       |
| 420        | 202                         | 100       |
| 430        | 166                         | 100       |
| 440        | 136                         | 100       |
| 450        | 110                         | 100       |
| 460        | 94                          | 100       |
| 470        | 74                          | 100       |
| 480        | 64                          | 100       |
| 490        | 54                          | 100       |
| 500        | 50                          | 100       |
| 510        | 46                          | 100       |
| 520        | 40                          | 100       |
| 530        | 40                          | 100       |
| 540        | 36                          | 100       |
| 550        | 34                          | 100       |
| 560        | 30                          | 100       |
| 570        | 24                          | 100       |
| 580        | 20                          | 100       |
| 590        | 24                          | 100       |
| 600        | 24                          | 100       |

### 3.8. General Procedure for Recyclable Visible Light Swing CO<sub>2</sub> Capture using Azobenzene-Guanidine **7** in Air

Air was flowed into 0.2 M of Azobenzene-guanidine **7** (10 mmol) ethanol solution in separable flask at a speed of 100 mL per minute by mass flow controller (MFC), and the resulting CO<sub>2</sub> concentration at the outlet side was measured over time. After CO<sub>2</sub> absorption, the separable flask was placed under a nitrogen atmosphere. The CO<sub>2</sub>-absorbed azobenzene-guanidine **7** in ethanol solution was irradiated with a blue light LED (Kessil PR 160L, 440 nm) by flowing N<sub>2</sub> gas at a speed of 50 mL per minute by MFC, and the resulting CO<sub>2</sub> concentration at the outlet side was measured over time. The results of investigating CO<sub>2</sub> absorption and release in three repeated cycles are summarized in Scheme 2, Table S8 and S9.

**Table S8.** CO<sub>2</sub> concentration on the outlet side during CO<sub>2</sub> absorption.

| time (min) | <i>1st</i> _CO <sub>2</sub><br>conc. (ppm) | <i>2nd</i> _CO <sub>2</sub><br>conc. (ppm) | <i>3rd</i> _CO <sub>2</sub><br>conc. (ppm) |
|------------|--------------------------------------------|--------------------------------------------|--------------------------------------------|
| 0          | 492                                        | 428                                        | 456                                        |
| 5          | 442                                        | 376                                        | 282                                        |
| 10         | 392                                        | 296                                        | 226                                        |
| 15         | 358                                        | 258                                        | 248                                        |
| 20         | 326                                        | 248                                        | 266                                        |
| 25         | 316                                        | 256                                        | 268                                        |
| 30         | 310                                        | 266                                        | 266                                        |
| 35         | 302                                        | 282                                        | 272                                        |
| 40         | 302                                        | 288                                        | 278                                        |
| 45         | 306                                        | 282                                        | 272                                        |
| 50         | 302                                        | 282                                        | 262                                        |
| 55         | 308                                        | 282                                        | 262                                        |
| 60         | 308                                        | 288                                        | 266                                        |
| 65         | 308                                        | 288                                        | 276                                        |
| 70         | 302                                        | 292                                        | 276                                        |
| 75         | 300                                        | 292                                        | 282                                        |
| 80         | 308                                        | 296                                        | 292                                        |
| 85         | 302                                        | 298                                        | 298                                        |
| 90         | 302                                        | 302                                        | 302                                        |
| 95         | 306                                        | 302                                        | 302                                        |
| 100        | 302                                        | 306                                        | 302                                        |
| 105        | 308                                        | 306                                        | 302                                        |
| 110        | 308                                        | 308                                        | 308                                        |
| 115        | 308                                        | 304                                        | 308                                        |
| 120        | 306                                        | 302                                        | 302                                        |

**Table S9.** CO<sub>2</sub> concentration on the outlet side during CO<sub>2</sub> emission.

| time (min) | <i>1st</i> _CO <sub>2</sub><br>conc. (ppm) | <i>2nd</i> _CO <sub>2</sub><br>conc. (ppm) | <i>3rd</i> _CO <sub>2</sub><br>conc. (ppm) |
|------------|--------------------------------------------|--------------------------------------------|--------------------------------------------|
| 0          | 30                                         | 52                                         | 62                                         |
| 5          | 70                                         | 52                                         | 62                                         |
| 10         | 176                                        | 90                                         | 310                                        |
| 15         | 358                                        | 398                                        | 844                                        |
| 20         | 598                                        | 742                                        | 1406                                       |
| 25         | 840                                        | 1024                                       | 1884                                       |
| 30         | 1030                                       | 1230                                       | 2172                                       |
| 35         | 1166                                       | 1366                                       | 2308                                       |
| 40         | 1244                                       | 1426                                       | 2314                                       |
| 45         | 1270                                       | 1426                                       | 2254                                       |
| 50         | 1260                                       | 1366                                       | 2112                                       |
| 55         | 1224                                       | 1282                                       | 1938                                       |
| 60         | 1176                                       | 1170                                       | 1754                                       |
| 65         | 1114                                       | 1074                                       | 1588                                       |
| 70         | 1050                                       | 970                                        | 1436                                       |
| 75         | 988                                        | 878                                        | 1306                                       |
| 80         | 918                                        | 798                                        | 1190                                       |
| 85         | 864                                        | 730                                        | 1080                                       |
| 90         | 804                                        | 658                                        | 980                                        |
| 95         | 754                                        | 602                                        | 878                                        |
| 100        | 698                                        | 552                                        | 796                                        |
| 105        | 660                                        | 498                                        | 724                                        |
| 110        | 616                                        | 448                                        | 650                                        |
| 115        | 578                                        | 408                                        | 592                                        |
| 120        | 544                                        | 366                                        | 538                                        |

### 3.10. Determination of light intensity

The photon flux of the LED lamp (Kessil PR 160L, 440 nm) was determined by chemical actinometry using 2,4-Dinitrobenzaldehyde.<sup>6</sup> Separable flask vessel were added 50 mL of a solution of 2,4-Dinitrobenzaldehyde (10 mM) in EtOH and 1,3,5-Triisopropylbenzene (10mM). The aliquot of the mixture ( $t = 0$  min) was analyzed by  $^1\text{H}$ -NMR and calculated the integration ratio of 2,4-Dinitrobenzaldehyde to 1,3,5-Triisopropylbenzene. The solution was irradiated with a LED lamp. The reaction mixture was irradiated with an LED lamp, and aliquots taken out of the reaction mixture were analyzed every 1 min to determine the concentration of 2,4-Dinitrobenzaldehyde. The 2,4-Dinitrobenzaldehyde concentrations were plotted as a function of the irradiation time (Supplementary Figure 1).

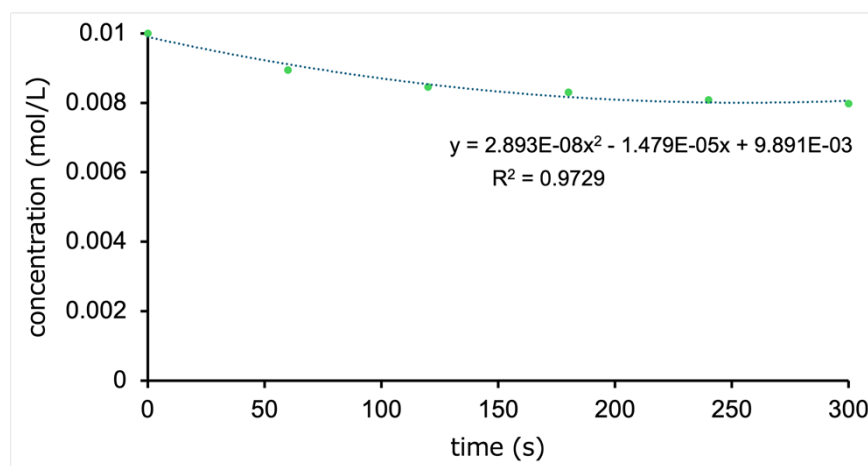

**Supplementary Figure 1.** Concentration of 2,4-Dinitrobenzaldehyde as a function of irradiation time.

The given polynomial is

$$[Act] = 2.893 \times 10^{-8} \times t^2 - 1.479 \times 10^{-5} \times t + 9.891 \times 10^{-3}$$

where  $[Act]$  represents the concentration of 2,4-Dinitrobenzaldehyde in  $\text{mol L}^{-1}$  and  $t$  functions as the irradiation time in s. The calculation formula of light intensity from the light source is given in the following form:

$$I_0 = -\frac{Vd[Act]}{dt} \left( \frac{1}{\phi} \right) \left( \frac{1}{1 - 10^{\epsilon b [Act]}} \right)$$

where  $I_0$  is the light intensity in  $\text{einstein s}^{-1}$ ,  $V$  is the volume of reaction solution in L,  $\phi$  is the quantum yield,  $\epsilon$  is the molar absorption coefficient in  $\text{L mol}^{-1} \text{cm}^{-1}$ , and  $b$  is the path length of light in cm. The path length of the light is  $b = 2.3$  cm (Supplementary Figure 2). The molar absorption coefficient of 2,4-Dinitrobenzaldehyde at 440 nm (the average

wavelength range over which LED lamp emits light) was  $\epsilon = 23.4 \text{ L mol}^{-1} \text{ cm}^{-1}$ , the reaction volume was  $V = 5.0 \times 10^{-2} \text{ L}$ , the quantum yield of photochemical degradation of 2,4-Dinitrobenzaldehyde is known to be  $\phi = 0.08$ , and the concentration of 2,4-Dinitrobenzaldehyde was  $[\text{Act}] = 1.0 \times 10^{-2} \text{ mol L}^{-1}$ . Based on these, the rightmost term can be assumed to be almost unity. The light intensity of the LED lamp can be calculated as follows:

$$I_0 = -\frac{5.0 \times 10^{-2} \times (-1.479 \times 10^{-5})}{0.08} \times 1 = 9.244 \times 10^{-6} \text{ (einstein / s)}$$

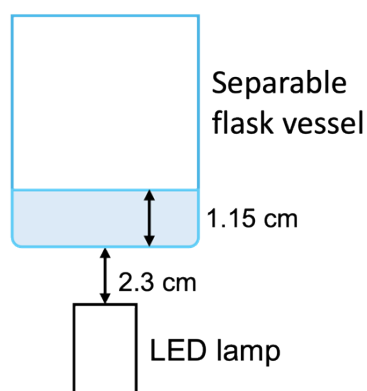

**Supplementary Figure 2.** Illustration of the reaction set.

#### 4. X-ray Crystallographic Analysis

Data were collected on a Dual-thickness MicroLoops (MiTeGen, 50  $\mu\text{m}$  in diameter) with a XtaLAB Synergy, Dualflex, HyPix Diffractometer. The crystal was kept at 100 K using  $\text{CuK}\alpha$  radiation ( $\lambda = 0.71073 \text{ \AA}$ ). The structure was solved by a ShelXT<sup>3</sup> structure solution program with Olex2<sup>4</sup> (Rigaku) and refined with the ShelXL<sup>5</sup> refinement package using Least Squares minimisation.

Crystal data for **3** (recrystallization from EtOH).  $\text{C}_{18}\text{H}_{24}\text{N}_6\text{O}_3$ ,  $M = 372.43$ , monoclinic, space group =  $P2_1/n$  (#14),  $a = 7.6781(4) \text{ \AA}$ ,  $b = 27.9980(13) \text{ \AA}$ ,  $c = 9.1512(3) \text{ \AA}$ ,  $\beta = 93.736(4)^\circ$ ,  $V = 1963.07(15) \text{ \AA}^3$ ,  $Z = 4$ , density (calc.) = 1.260, total reflections collected = 45123, unique reflections = 5917 ( $R_{\text{int}} = 0.0386$ ), GOF = 1.034 The final  $R_1$  factor was 0.0747 ( $I > 2\sigma(I)$ ) ( $wR_2 = 0.1742$ , all data).

**Table S8.** Fractional Atom coordinates ( $\times 10^4$ ) and Equivalent Isotropic Displacement Parameters ( $\text{\AA}^2 \times 10^3$ ) for **3**.  $U_{\text{eq}}$  is defined as 1/3 of the trace of the orthogonalised  $U_{ij}$  tensor

| Atom | <i>x</i> | <i>y</i>   | <i>z</i>   | $U_{\text{eq}}$ |
|------|----------|------------|------------|-----------------|
| O001 | 12315(2) | 8118.1(6)  | 6053.3(15) | 68.8(5)         |
| O002 | 9756(2)  | 7812.7(7)  | 5437.2(16) | 77.0(5)         |
| O003 | 10537(2) | 7919.2(7)  | 7790.2(16) | 83.1(6)         |
| N3   | 5120(3)  | 6937.0(7)  | 7537.3(19) | 65.6(5)         |
| N5   | 6904(3)  | 7214.4(8)  | 5741.2(19) | 70.9(6)         |
| N4   | 7544(3)  | 7375.0(9)  | 8146(2)    | 90.5(8)         |
| C007 | 10781(3) | 7940.7(8)  | 6485(2)    | 59.5(6)         |
| C008 | 3882(3)  | 6663.9(8)  | 6682(2)    | 60.7(6)         |
| C009 | 6508(3)  | 7172.4(9)  | 7115(2)    | 60.8(6)         |
| N00A | -4850(3) | 4361.7(8)  | 969(3)     | 89.3(7)         |
| C00B | -3716(3) | 4664.3(8)  | 1720(3)    | 67.8(6)         |
| N1   | 355(4)   | 5593.8(10) | 3853(3)    | 103.6(9)        |
| C00D | 4345(4)  | 6360.7(9)  | 5579(3)    | 74.4(7)         |
| N2   | -366(4)  | 5788.1(12) | 4662(3)    | 116.5(11)       |
| C00F | -1330(4) | 5282.5(10) | 3215(3)    | 84.6(9)         |
| C00G | 13599(3) | 8275.2(11) | 7163(3)    | 77.1(7)         |
| C00H | 1347(5)  | 6096.1(12) | 5285(4)    | 97.4(11)        |
| C00I | -1984(4) | 4697.6(10) | 1378(3)    | 84.5(8)         |
| C00J | 2167(4)  | 6677.1(11) | 7055(3)    | 82.2(8)         |
| C00K | 3054(5)  | 6080.2(10) | 4870(3)    | 91.2(10)        |
| C00L | -848(4)  | 4999.1(11) | 2105(4)    | 90.4(9)         |
| C00M | -4208(4) | 4951.8(10) | 2862(3)    | 88.3(8)         |
| C00N | -3024(5) | 5253.7(10) | 3598(3)    | 94.9(9)         |
| C00O | 15125(4) | 8458.8(12) | 6393(3)    | 93.2(9)         |
| C00P | 923(4)   | 6398.1(12) | 6380(4)    | 98.9(10)        |
| C00Q | -4301(5) | 4091.5(12) | -274(4)    | 116.4(12)       |
| C00R | -6622(4) | 4309.8(13) | 1342(5)    | 121.6(13)       |

**Table S9.** Anisotropic Displacement Parameters ( $\text{\AA}^2 \times 10^3$ ) for **3**. The Anisotropic displacement factor exponent takes the form:  $-2p^2 [h^2a^{*2}U_{11}+2hka^*b^*U_{12}+\dots]$ .

| Atom | U <sub>11</sub> | U <sub>22</sub> | U <sub>33</sub> | U <sub>23</sub> | U <sub>13</sub> | U <sub>12</sub> |
|------|-----------------|-----------------|-----------------|-----------------|-----------------|-----------------|
| O001 | 77.2(11)        | 84.1(12)        | 45.3(8)         | -6.3(7)         | 6.0(7)          | -15.0(9)        |
| O002 | 88.8(12)        | 101.6(13)       | 39.7(8)         | 6.5(8)          | -2.9(8)         | -27.7(10)       |
| O003 | 88.9(12)        | 122.5(16)       | 37.9(8)         | -0.3(9)         | 4.3(8)          | -21.6(11)       |
| N3   | 75.6(13)        | 82.3(14)        | 39.1(9)         | -4.9(9)         | 5.9(8)          | -14.6(11)       |
| N5   | 82.6(14)        | 90.1(15)        | 39.5(9)         | 1.6(9)          | 0.5(9)          | -17.8(11)       |
| N4   | 103.9(17)       | 129(2)          | 37.5(9)         | -2.1(11)        | 0.2(10)         | -48.4(15)       |
| C007 | 75.1(15)        | 63.7(13)        | 39.9(10)        | 2.7(9)          | 4.9(10)         | -4.7(11)        |
| C008 | 72.2(15)        | 63.7(14)        | 45.0(11)        | 5.3(10)         | -5.7(10)        | -4.9(11)        |
| C009 | 73.2(15)        | 69.1(14)        | 39.4(10)        | -1.3(10)        | -0.9(10)        | -5.2(12)        |
| N00A | 86.2(17)        | 74.6(15)        | 104.0(18)       | -7.8(13)        | -16.2(14)       | -8.2(13)        |
| C00B | 74.6(16)        | 52.4(13)        | 74.9(15)        | 3.4(11)         | -7.7(13)        | 3.2(12)         |
| N1   | 141(2)          | 88.9(18)        | 85.3(17)        | 28.7(14)        | 37.3(17)        | 49.4(17)        |
| C00D | 94.4(19)        | 71.7(16)        | 56.6(13)        | -5.5(12)        | 1.5(13)         | -5.9(14)        |
| N2   | 122(2)          | 129(2)          | 103(2)          | 52.2(18)        | 42.7(18)        | 64(2)           |
| C00F | 98(2)           | 60.5(16)        | 90(2)           | 14.3(15)        | -31.4(17)       | -20.4(15)       |
| C00G | 74.8(16)        | 96.0(19)        | 60.3(14)        | -16.3(13)       | 1.8(12)         | -9.1(14)        |
| C00H | 102(2)          | 84(2)           | 99(2)           | 37.1(18)        | -49(2)          | -38.7(18)       |
| C00I | 95(2)           | 70.8(17)        | 88.3(19)        | -12.5(14)       | 7.6(16)         | -7.7(15)        |
| C00J | 78.8(18)        | 85.0(19)        | 82.2(18)        | 1.2(15)         | 1.4(15)         | -2.8(15)        |
| C00K | 145(3)          | 67.4(17)        | 58.1(15)        | -4.5(12)        | -20.1(17)       | -14.9(18)       |
| C00L | 81.4(19)        | 75.3(18)        | 113(2)          | -5.0(18)        | -4.4(17)        | -8.2(15)        |
| C00M | 86(2)           | 74.3(18)        | 105(2)          | -6.0(17)        | 14.1(17)        | 2.6(15)         |
| C00N | 139(3)          | 65.7(17)        | 79.8(19)        | -13.6(14)       | 1.8(19)         | -4.1(19)        |
| C00O | 79.4(19)        | 110(2)          | 91(2)           | -16.2(17)       | 8.7(15)         | -13.6(17)       |
| C00P | 84(2)           | 96(2)           | 113(3)          | 9(2)            | -22.1(19)       | -15.9(18)       |
| C00Q | 159(3)          | 86(2)           | 101(2)          | -19.8(19)       | -14(2)          | -25(2)          |
| C00R | 84(2)           | 103(3)          | 173(4)          | 5(3)            | -32(2)          | -7.7(19)        |

**Table S10.** Bond Lengths for **3**.

| Atom | Atom | Length/ $\text{\AA}$ | Atom | Atom | Length/ $\text{\AA}$ |
|------|------|----------------------|------|------|----------------------|
| O001 | C007 | 1.361(3)             | C00B | C00M | 1.391(4)             |
| O001 | C00G | 1.438(3)             | N1   | N2   | 1.097(3)             |
| O002 | C007 | 1.253(3)             | N1   | C00F | 1.636(4)             |
| O003 | C007 | 1.222(2)             | C00D | C00K | 1.392(4)             |
| N3   | C008 | 1.416(3)             | N2   | C00H | 1.643(4)             |
| N3   | C009 | 1.332(3)             | C00F | C00L | 1.359(4)             |
| N5   | C009 | 1.317(3)             | C00F | C00N | 1.372(4)             |
| N4   | C009 | 1.322(3)             | C00G | C00O | 1.497(4)             |
| C008 | C00D | 1.383(3)             | C00H | C00K | 1.389(5)             |
| C008 | C00J | 1.382(4)             | C00H | C00P | 1.367(5)             |
| N00A | C00B | 1.368(3)             | C00I | C00L | 1.357(4)             |
| N00A | C00Q | 1.451(4)             | C00J | C00P | 1.352(4)             |
| N00A | C00R | 1.432(4)             | C00M | C00N | 1.384(4)             |
| C00B | C00I | 1.389(4)             |      |      |                      |

**Table S11.** Bond Angles for **3**.

| Atom Atom Atom | Angle/°    | Atom Atom Atom | Angle/°  |
|----------------|------------|----------------|----------|
| C007 O001 C00G | 118.25(17) | N2 N1 C00F     | 94.7(3)  |
| C009 N3 C008   | 128.90(18) | C008 C00D C00K | 118.5(3) |
| O002 C007 O001 | 113.23(18) | N1 N2 C00H     | 93.8(3)  |
| O003 C007 O001 | 119.5(2)   | C00L C00F N1   | 109.3(3) |
| O003 C007 O002 | 127.3(2)   | C00L C00F C00N | 117.7(3) |
| C00D C008 N3   | 122.7(2)   | C00NC00F N1    | 133.0(3) |
| C00J C008 N3   | 117.7(2)   | O001 C00G C00O | 107.1(2) |
| C00J C008 C00D | 119.4(2)   | C00K C00H N2   | 129.5(4) |
| N5 C009 N3     | 124.1(2)   | C00P C00H N2   | 110.8(3) |
| N5 C009 N4     | 118.5(2)   | C00P C00H C00K | 119.6(3) |
| N4 C009 N3     | 117.42(19) | C00L C00I C00B | 121.7(3) |
| C00B N00A C00Q | 120.6(3)   | C00P C00J C008 | 121.9(3) |
| C00B N00A C00R | 121.8(3)   | C00H C00K C00D | 120.7(3) |
| C00R N00A C00Q | 117.6(3)   | C00I C00L C00F | 122.2(3) |
| N00A C00B C00I | 121.0(3)   | C00NC00M C00B  | 121.1(3) |
| N00A C00B C00M | 122.8(3)   | C00F C00N C00M | 121.0(3) |
| C00I C00B C00M | 116.2(3)   | C00J C00P C00H | 119.8(3) |

**Table S12.** Hydrogen Atom Coordinates ( $\text{\AA}\times 10^4$ ) and Isotropic Displacement Parameters ( $\text{\AA}^2\times 10^3$ ) for **3**.

| Atom | x        | y       | z       | U(eq) |
|------|----------|---------|---------|-------|
| H3   | 4952.21  | 6953.17 | 8456.09 | 79    |
| H5A  | 7819.32  | 7370.99 | 5532.56 | 85    |
| H5B  | 6247.82  | 7085.35 | 5053.39 | 85    |
| H4A  | 8452.9   | 7529.95 | 7914.08 | 109   |
| H4B  | 7309.23  | 7351.79 | 9049.69 | 109   |
| H00D | 5493.48  | 6344.6  | 5317.22 | 89    |
| H00H | 13955.39 | 8011.63 | 7802.83 | 93    |
| H00O | 13123.27 | 8525.98 | 7750.42 | 93    |
| H00I | -1593.38 | 4508.4  | 630.27  | 101   |
| H00J | 1860.78  | 6883.85 | 7790.57 | 99    |
| H00K | 3337.39  | 5879.92 | 4110.38 | 109   |
| H00L | 297.55   | 5012.26 | 1835.03 | 108   |
| H00M | -5353.08 | 4940.96 | 3135.86 | 106   |
| H00N | -3382.83 | 5439.91 | 4364.74 | 114   |
| H00Q | 14778.34 | 8735.27 | 5825.83 | 140   |
| H00R | 15526.67 | 8215.36 | 5757.46 | 140   |
| H00S | 16049.66 | 8543.68 | 7102.85 | 140   |
| H00P | -218.28  | 6411.58 | 6660.42 | 119   |
| H00A | -3737.26 | 4301.39 | -925.26 | 175   |
| H00B | -5301.68 | 3948.31 | -782.41 | 175   |
| H00C | -3499.61 | 3846.07 | 64.7    | 175   |
| H00E | -6654.68 | 4276.28 | 2383.7  | 182   |
| H00F | -7122.75 | 4031.36 | 868.29  | 182   |
| H00G | -7277.83 | 4587.1  | 1023.68 | 182   |

## 5. References

- (1) T. Hu, G. Zheng, D. Xue, S. Zhao, F. Li, F. Zhou, L. Xie, C. Tian, T. Hua, S. Zhao, Y. Xu, G. Zhong, Z.-J. Liu, A. Makriyannis, R. C. Stevens and H. Tao, *J. Med. Chem.*, 2021, **64**, 13752-13765.
- (2) Y. Li, Z. Liu, H. Li, Q. Xu, J. He and J. Lu, *ACS Appl. Mater. Interfaces.*, 2017, **9**, 9926-9934.
- (3) O. V. Dolomanov, L. J. Bourhis, R. J. Gildea, J. A. K. Howard and H. Puschmann, *J. Appl. Cryst.* 2009, **42**, 339-341.
- (4) G. M. Sheldrick, *Acta. Cryst.* 2015, **A71**, 3-8.
- (5) G. M. Sheldrick, *Acta. Cryst.* 2015, **C71**, 3-8.
- (6) Y. Ji, D. A. DiRocco, C. M. Hong, M. K. Wismer and M. Reibarkh, *Org Lett.*, 2018, **20**, 2156–2159.

## 6. NMR Spectra

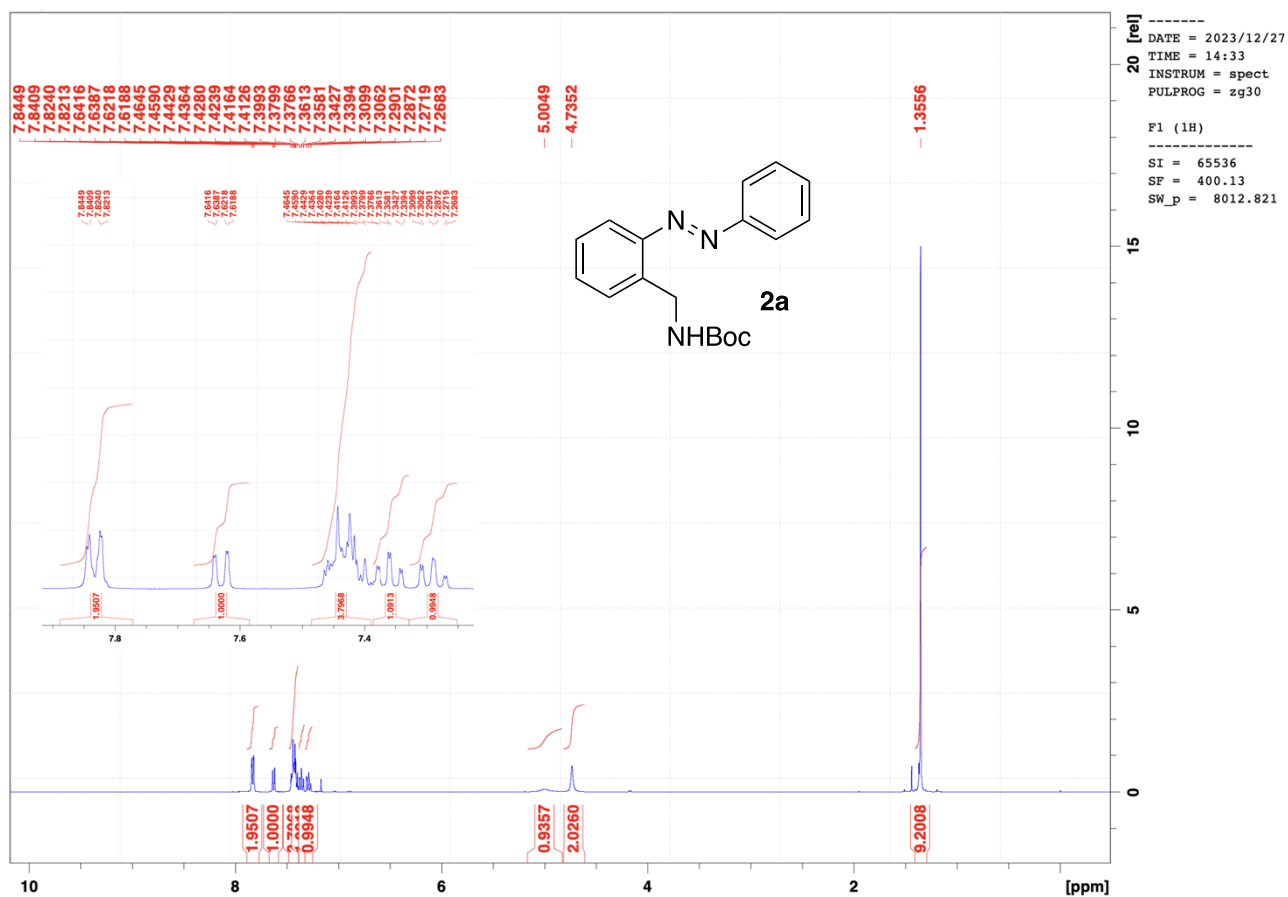

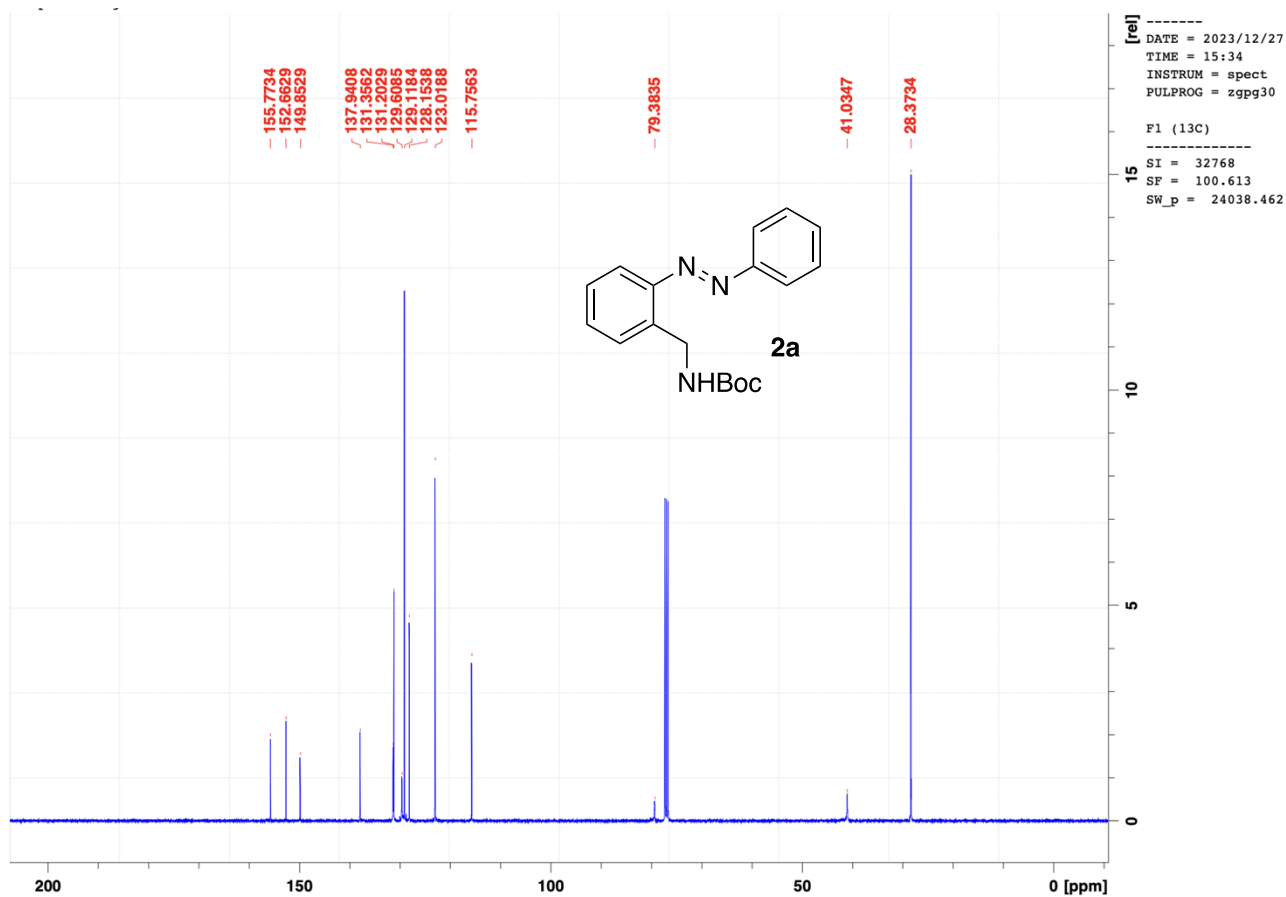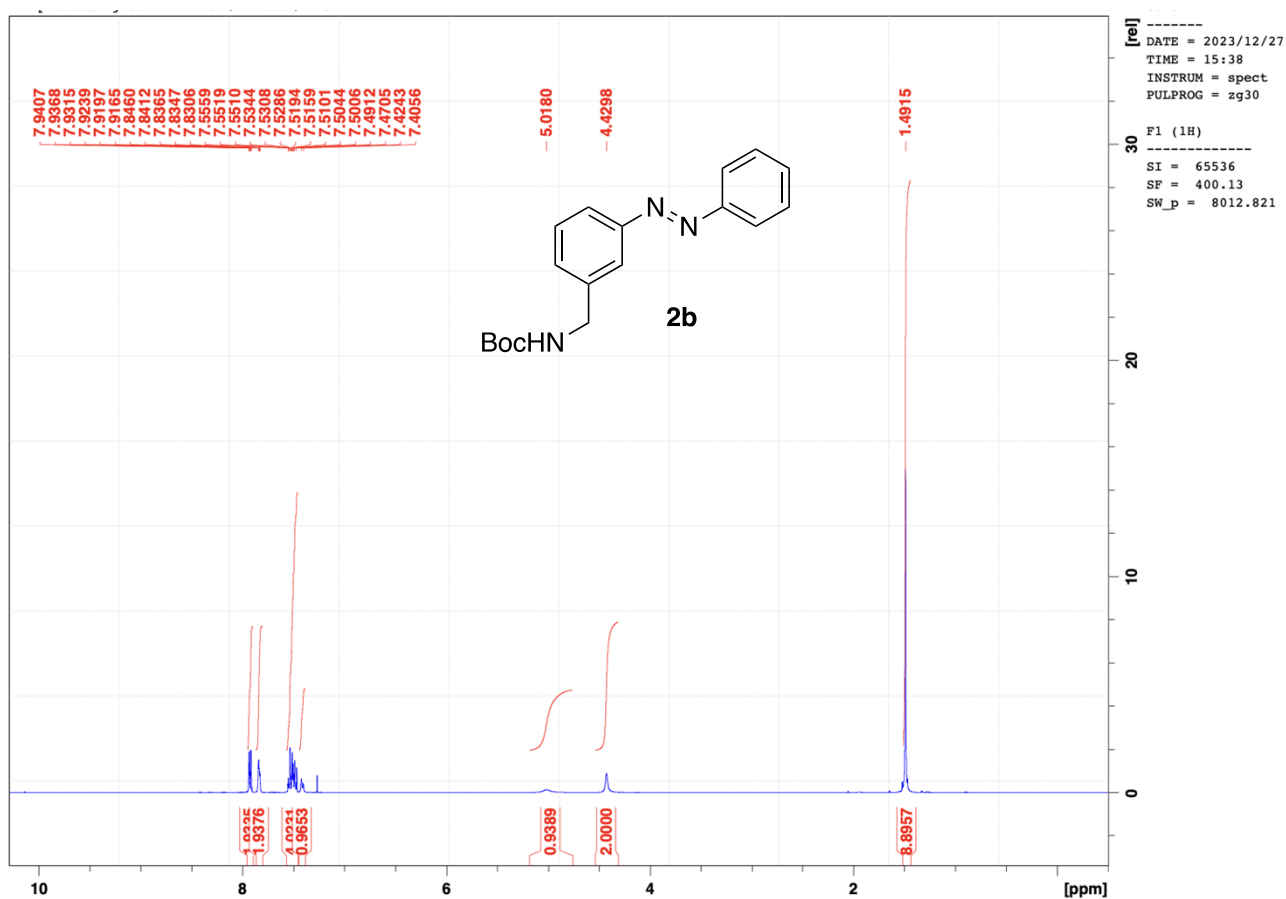

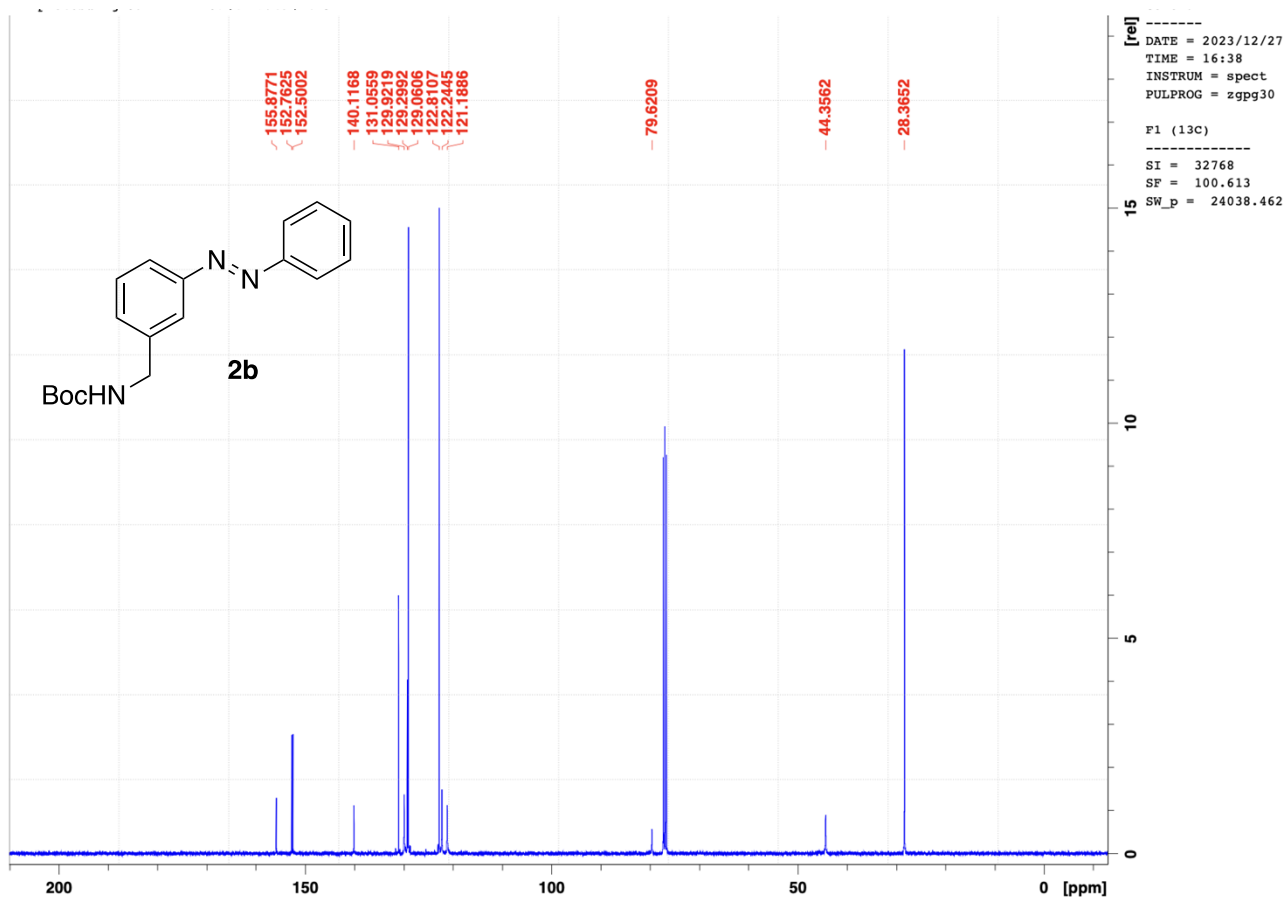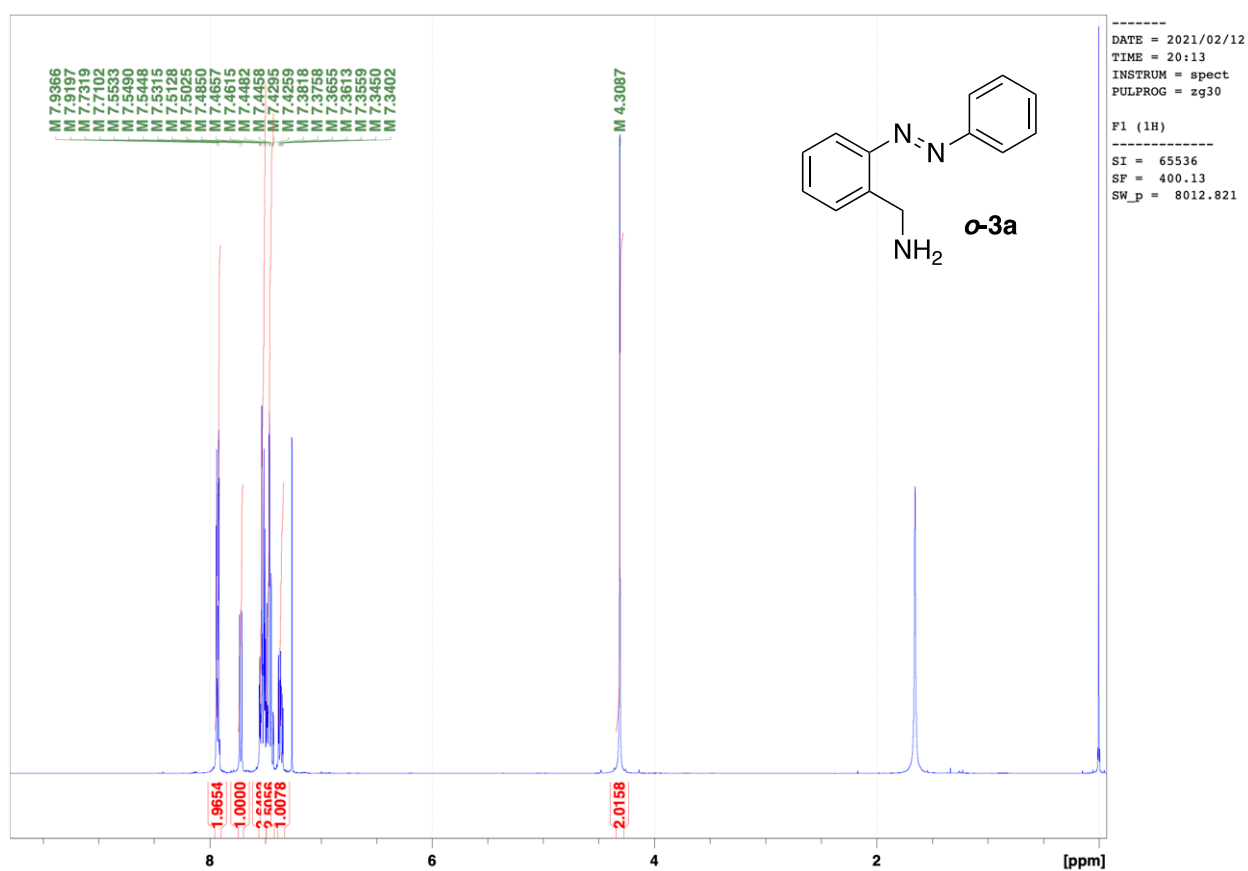

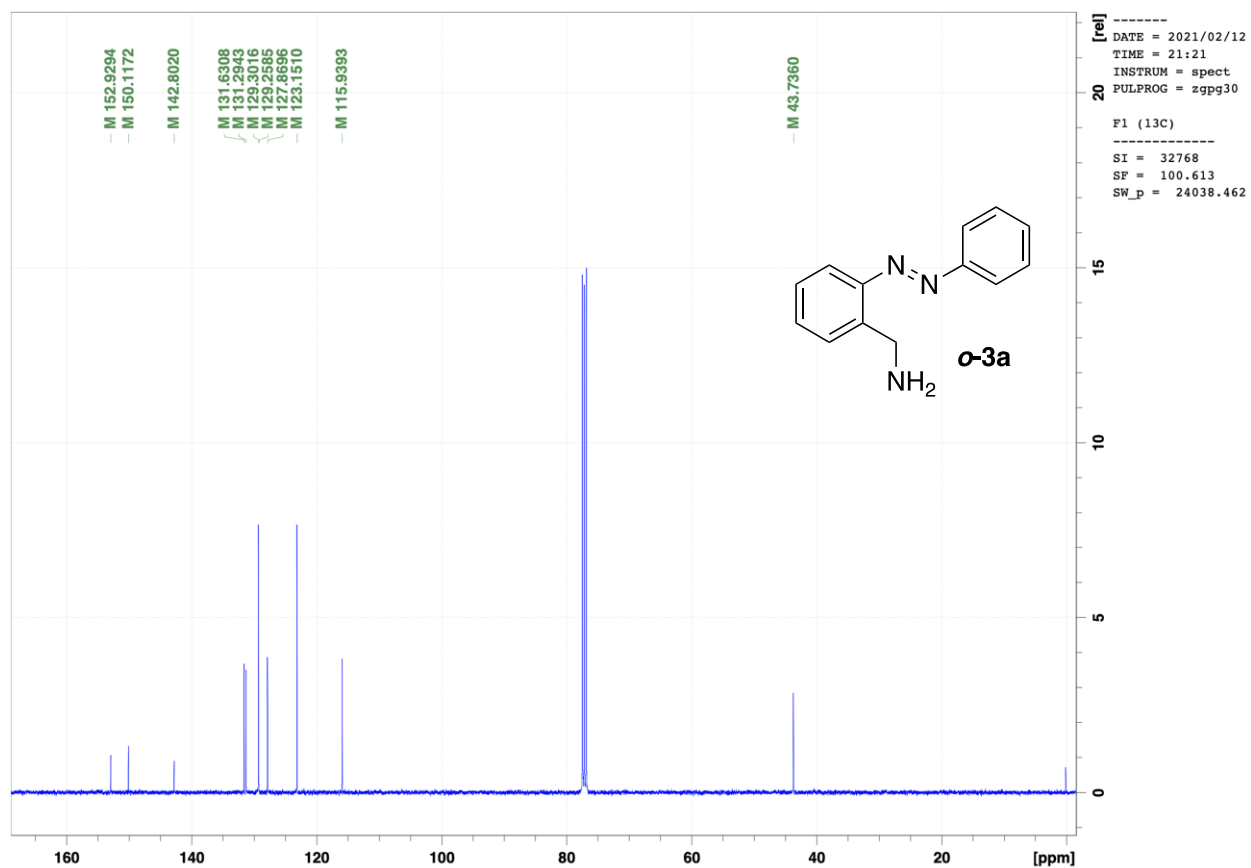

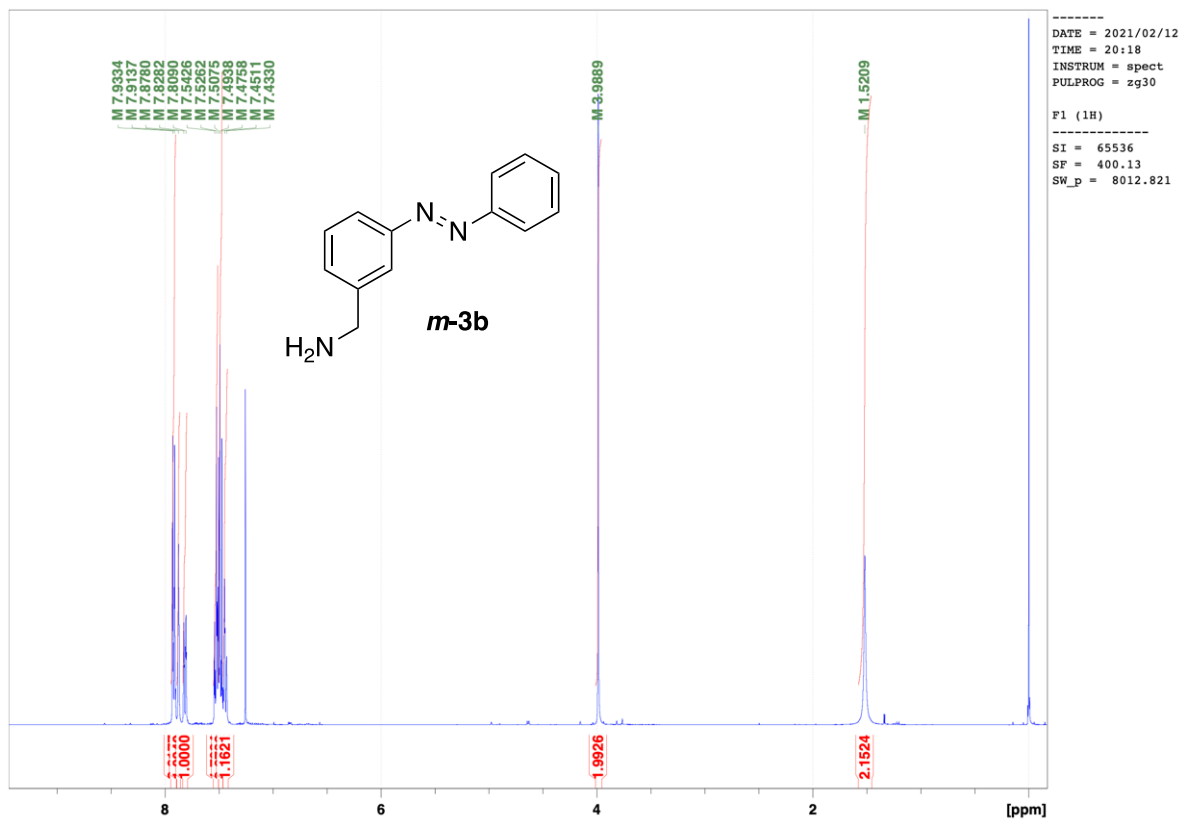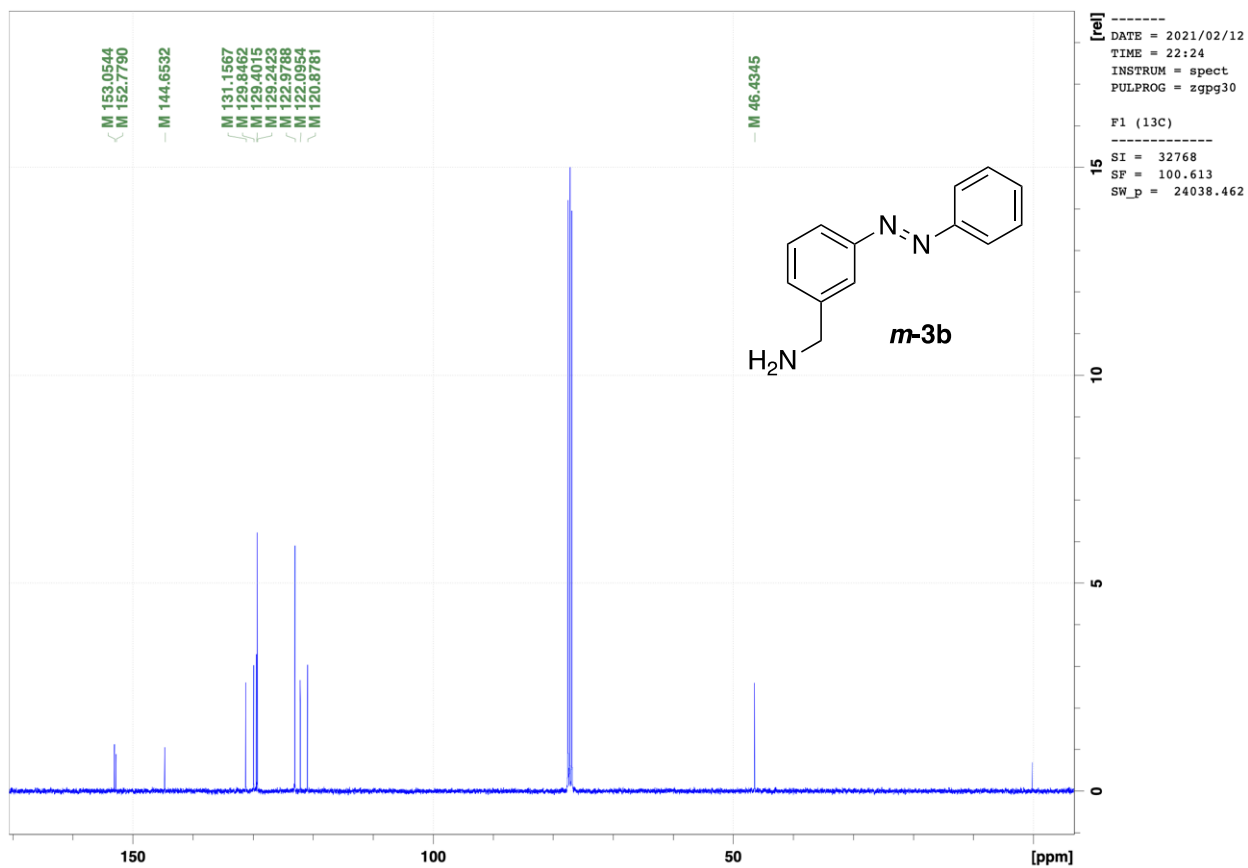

"KSG-4 H" 1 1 C:\NMRData\INAGAKI

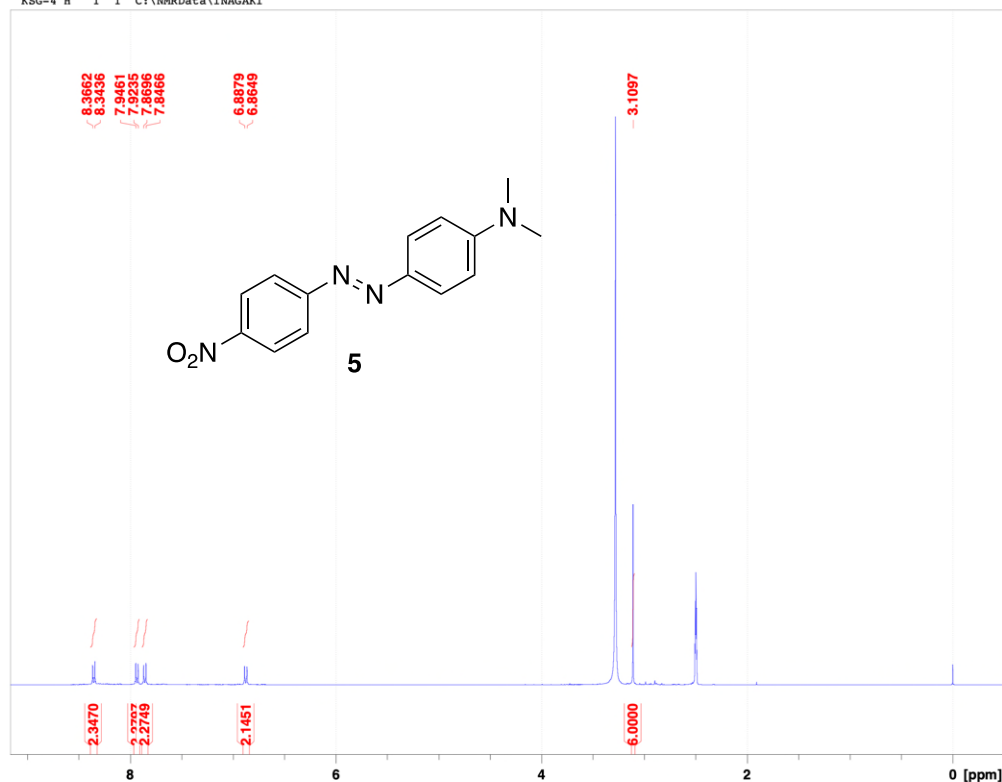

General

DATE = 2023/05/26  
TIME = 00:05  
INSTRUM = spect  
PULPROG = zg30

F1 (1H)

SI = 65536  
SF = 400.13  
SW\_p = 8012.821

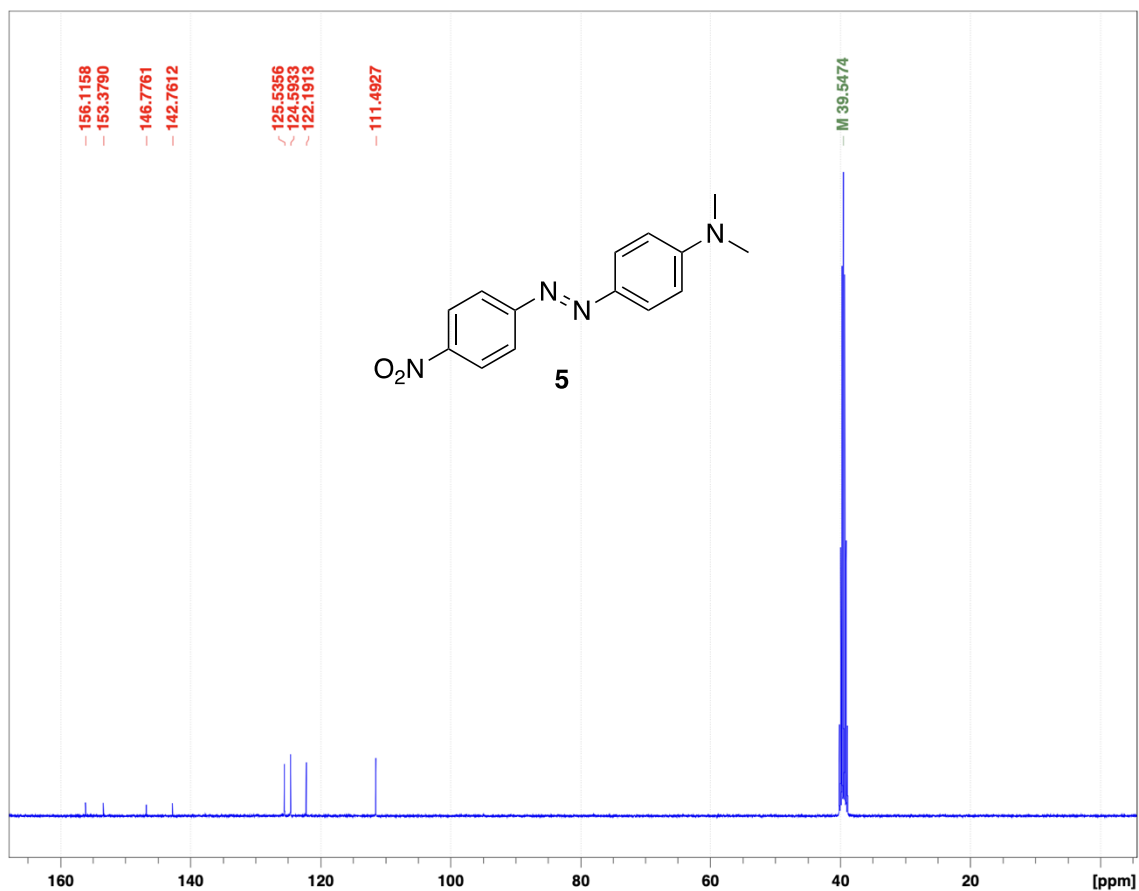

DATE = 2023/05/26  
TIME = 23:10  
INSTRUM = spect  
PULPROG = zgpg30

F1 (13C)

SI = 32768  
SF = 100.613  
SW\_p = 24038.462

"KSG-5 H" 1 1 C:\NMRData\INAGAKI

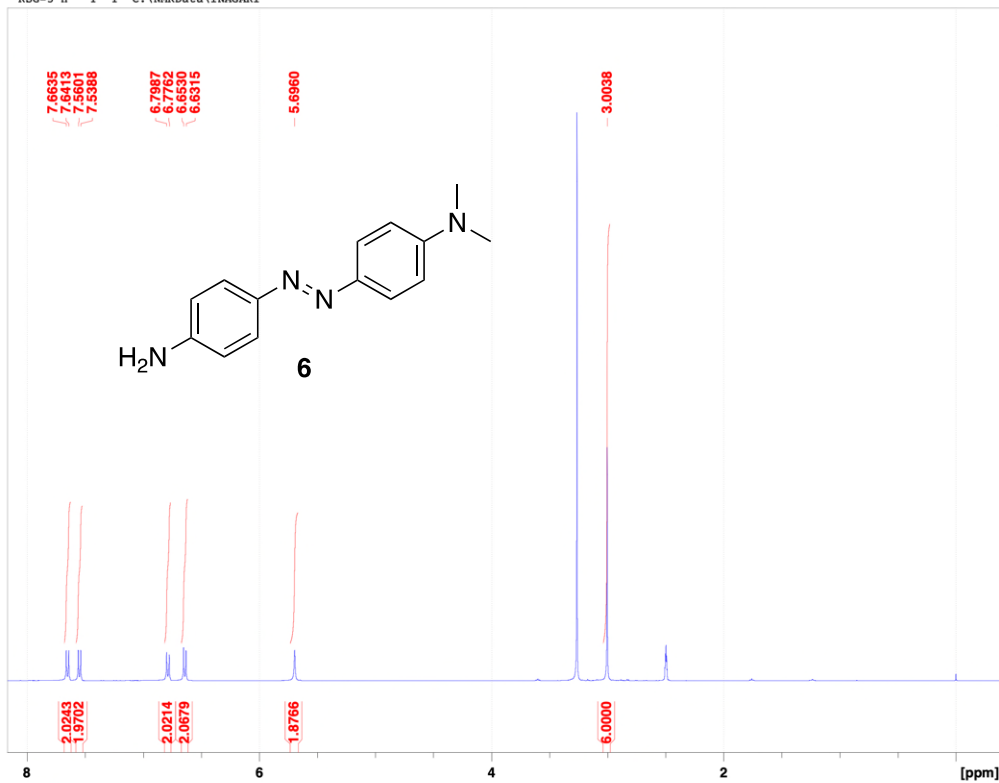

General

DATE = 2023/05/26  
TIME = 01:09  
INSTRUM = spect  
PULPROG = zg30  
F1 (1H)  
SI = 65536  
SF = 400.13  
SW\_p = 8012.821

"KSG-5 C" 1 1 C:\NMRData\INAGAKI

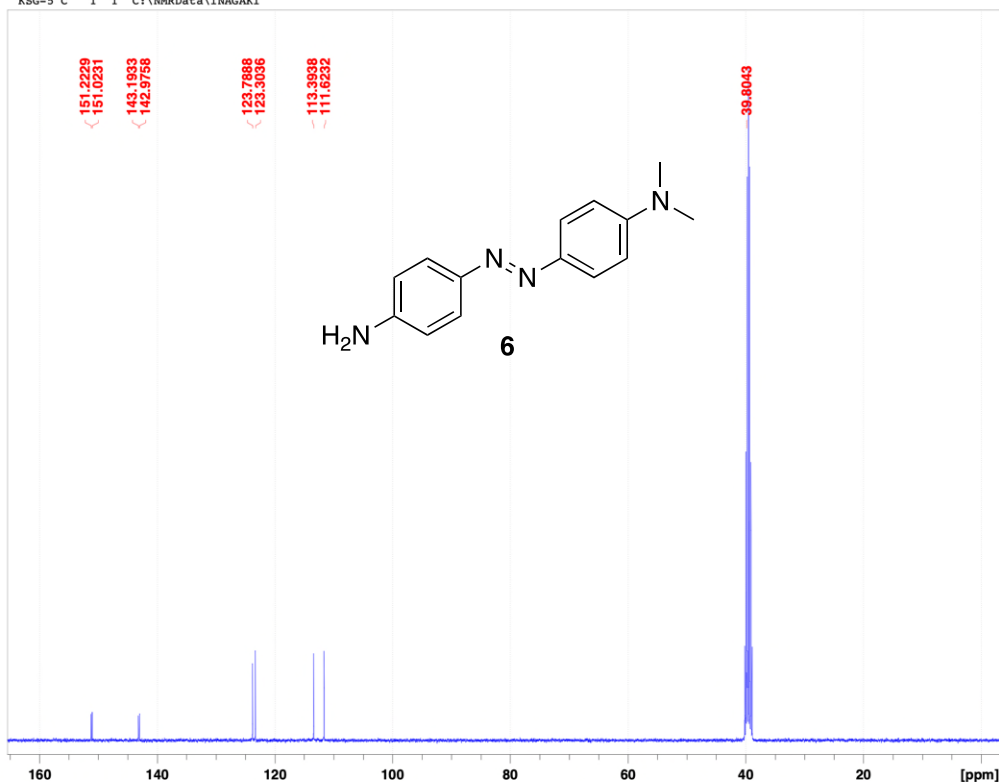

General

DATE = 2023/05/26  
TIME = 02:09  
INSTRUM = spect  
PULPROG = zgpg30  
F1 (13C)  
SI = 32768  
SF = 100.613  
SW\_p = 24038.462

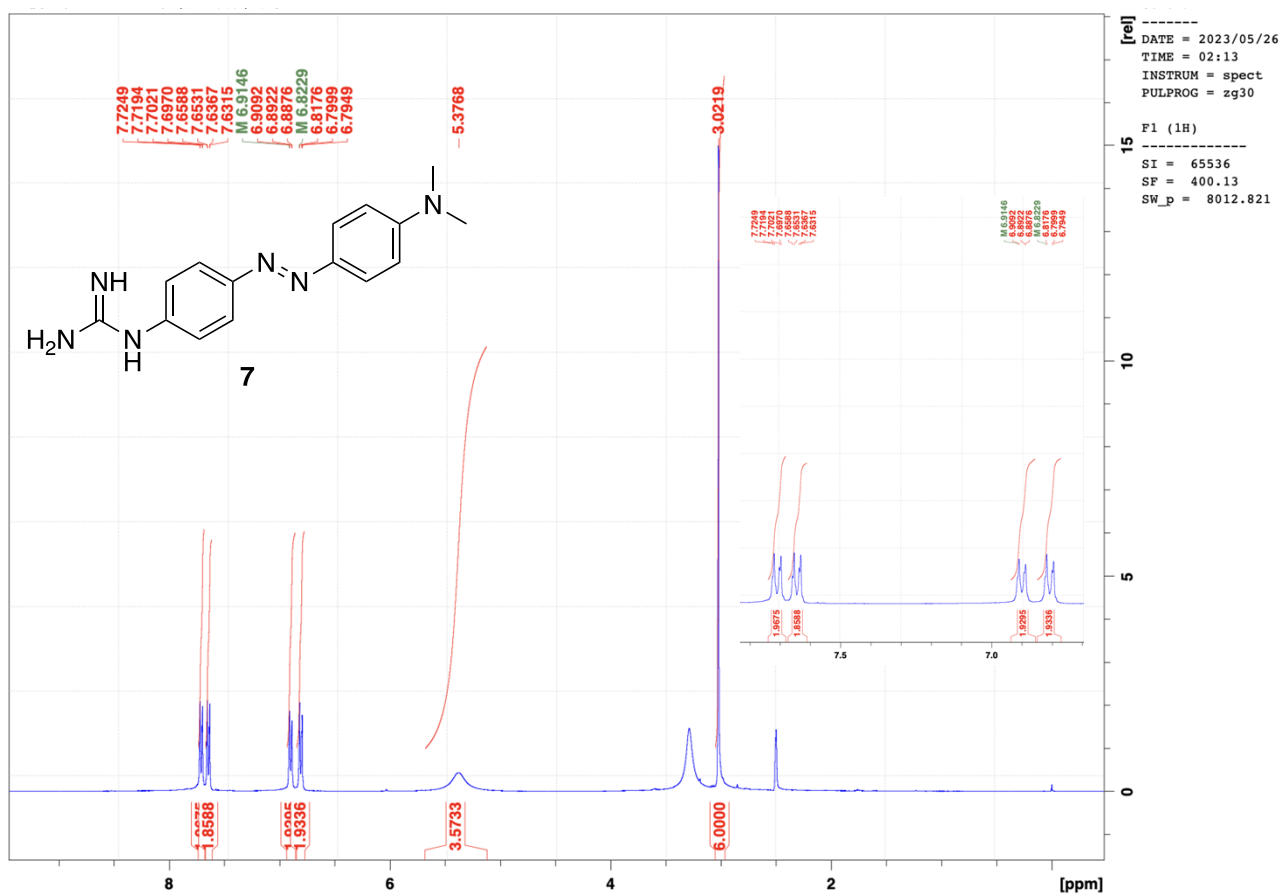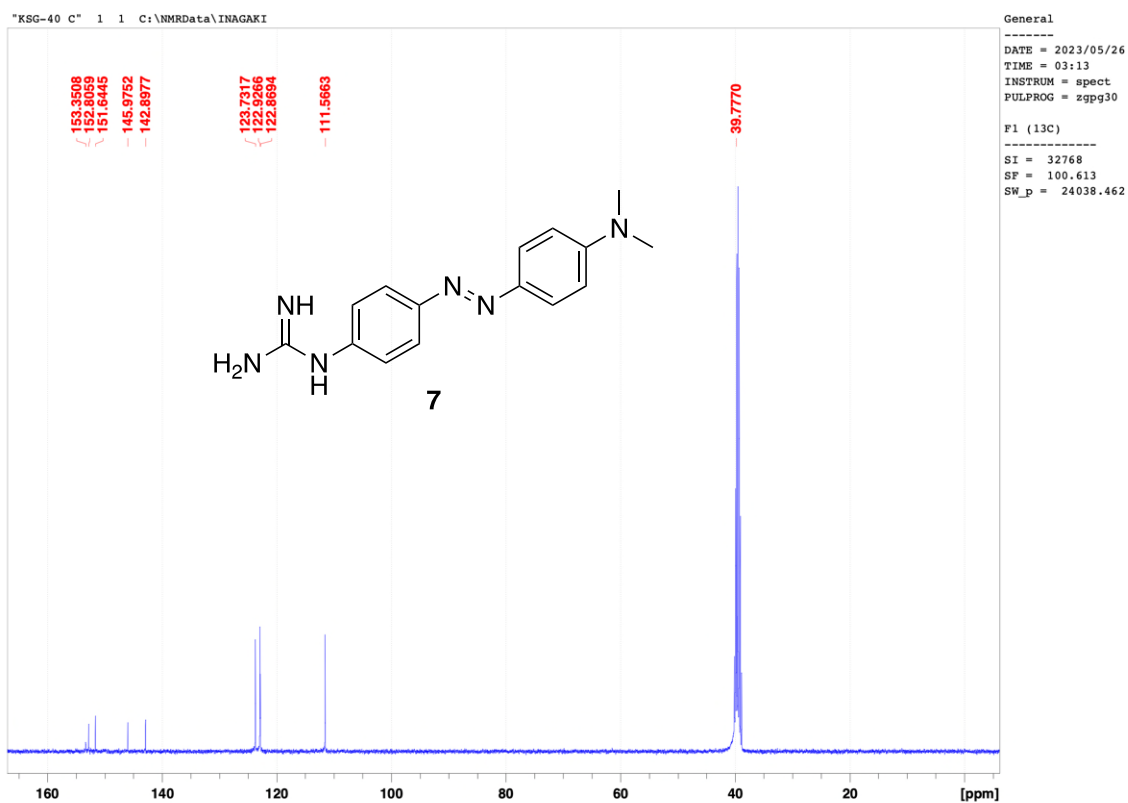

Supplement: d4gc00736k1.pdf [file d4gc00736k1.pdf]
